# Supplementary material for: Measurement of Autophagy Activity Reveals Time-Dependent, Bacteria-Specific Turnover during Mycobacterium tuberculosis Infection
Source: MDPI journal article supplement (doi:10.3390/pathogens12010024), 2022-12-23
Supplement: s1 [file s1]

Supplementary Table S1 (Table S1)

**Table S1.** Cell counts per infection population group.

| No. of cells counted (LC3B-II)    | 4hrs     |          | 24hrs    |          | 48hrs    |          | 72hrs    |          | Total    |
|-----------------------------------|----------|----------|----------|----------|----------|----------|----------|----------|----------|
|                                   | Con      | Baf      | Con      | Baf      | Con      | Baf      | Con      | Baf      |          |
| Uninfected                        | 262      | 284      | 421      | 640      | 600      | 918      | 812      | 779      | 4716     |
| Infected                          | 299      | 274      | 235      | 291      | 338      | 420      | 287      | 513      | 2657     |
| Uninfected sub-pop                | 277      | 255      | 192      | 238      | 310      | 377      | 275      | 453      | 2377     |
| Infected sub-pop                  | 22       | 19       | 43       | 53       | 28       | 43       | 12       | 60       | 280      |
| Total                             | 860      | 832      | 891      | 1222     | 1276     | 1758     | 1386     | 1805     | 10030    |
| % bacteria-containing macrophages | 7.35786  | 6.934307 | 18.29787 | 18.21306 | 8.284024 | 10.2381  | 4.181185 | 11.69591 | 10.5382  |
|                                   |          |          |          |          |          |          |          |          |          |
| No. of cells counted (p62)        | 4hrs     |          | 24hrs    |          | 48hrs    |          | 72hrs    |          | Total    |
|                                   | Con      | Baf      | Con      | Baf      | Con      | Baf      | Con      | Baf      |          |
| Uninfected                        | 269      | 360      | 423      | 514      | 648      | 790      | 652      | 946      | 4602     |
| Infected                          | 231      | 314      | 259      | 345      | 375      | 443      | 495      | 480      | 2942     |
| Uninfected sub-pop                | 214      | 293      | 248      | 318      | 331      | 385      | 464      | 456      | 2709     |
| Infected sub-pop                  | 17       | 21       | 11       | 27       | 44       | 58       | 31       | 24       | 233      |
| Total                             | 731      | 988      | 941      | 1204     | 1398     | 1676     | 1642     | 1906     | 10486    |
| % bacteria-containing macrophages | 7.359307 | 6.687898 | 4.247104 | 7.826087 | 11.73333 | 13.09255 | 6.262626 | 5        | 7.919782 |

Supplementary Figure S1 (Figure S1)

**A**

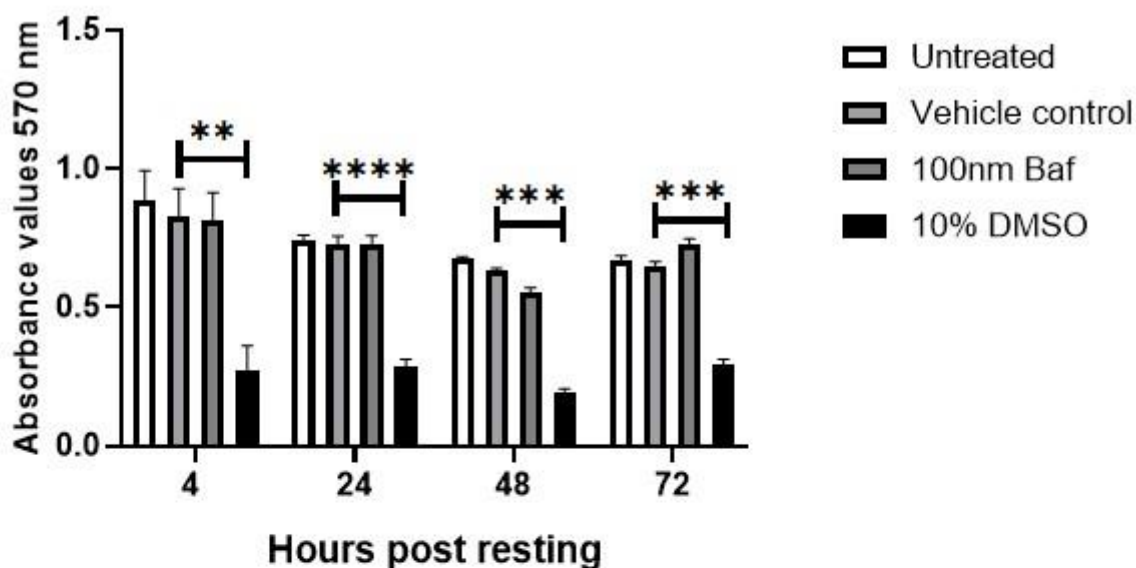

**B**

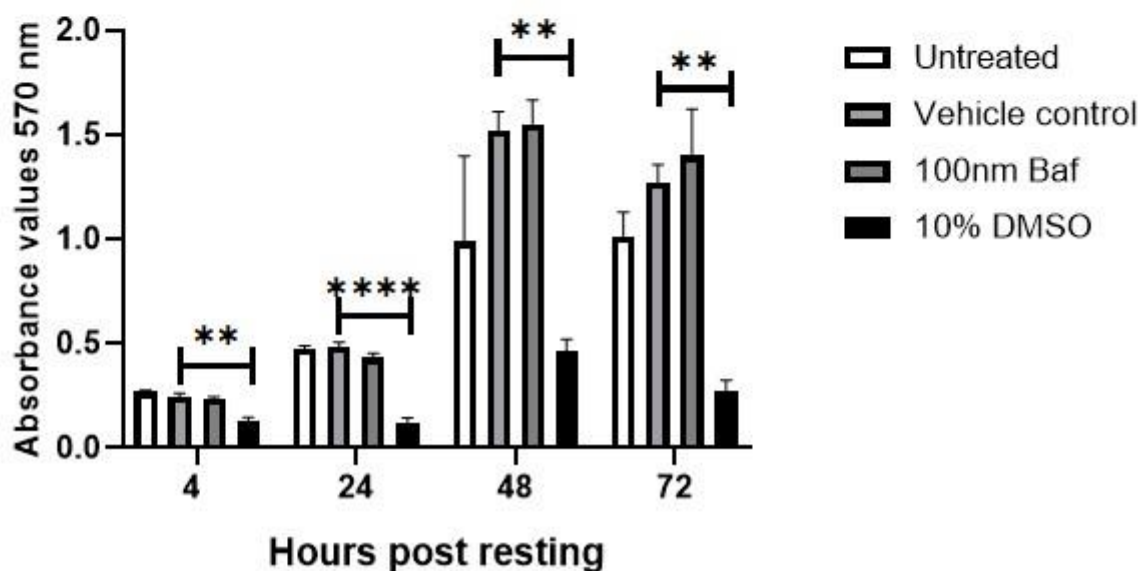

**Figure S1. Bafilomycin treatment of 100 nM for three hours does not decrease cell viability in THP-1 and RAW264.7 macrophages.** THP-1 (A) and RAW 264.7 (B) were treated with 100 nM Bafilomycin for three hours prior to each time point. Macrophages were then subjected to MTT cell viability test at 0.25 mg/mL MTT. Data shows Bafilomycin treatment had no negative effect on cell viability on these macrophages. \*\*  $p < 0.01$ , \*\*\*  $p < 0.001$ , \*\*\*\*  $p < 0.0001$ .
